# Supplementary material for: Biocontrol of Biofilm Formation: Jamming of Sessile-Associated Rhizobial Communication by Rhodococcal Quorum-Quenching
Source: MDPI journal article supplement (doi:10.3390/ijms22158241), 2021-07-31
Supplement: s1 [file s1]

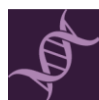

Article

# Biocontrol of Biofilm Formation: Jamming Sessile-Associated Rhizobial Communication by Rhodococcal Quorum-Quenching

Yvann Bourigault <sup>1,2</sup>, Sophie Rodrigues <sup>3</sup>, Alexandre Crépin <sup>4</sup>, Andrea Chane <sup>1</sup>, Laure Taupin <sup>3</sup>, Mathilde Bouteiller <sup>1,2</sup>, Charly Dupont <sup>1,2</sup>, Annabelle Merieau <sup>1,2</sup>, Yoan Konto-Ghiorghi <sup>1,2</sup>, Amine M. Boukerb <sup>1</sup>, Marie Turner <sup>5,6</sup>, Céline Hamon <sup>5</sup>, Alain Dufour <sup>3</sup>, Corinne Barbey <sup>1,2</sup>, and Xavier Latour <sup>1,2,\*</sup>

<sup>1</sup> Laboratory of Microbiology Signals and Microenvironment (LMSM EA 4312), University of Rouen Normandy, 55 rue Saint-Germain, F-27000 Evreux, France; yvann.bourigault@univ-rouen.fr (Y.B.); corinne.barbey@univ-rouen.fr (C.B.); chane.andrea@gmail.com (A.C.); mathilde.bouteiller7@univ-rouen.fr (M.B.); charly.dupont7@univ-rouen.fr (C.D.); annabelle.merieau@univ-rouen.fr (A.M.); yoan.konto-ghiorghi@univ-rouen.fr (Y.K-G); amine.boukerb@univ-rouen.fr (A.M.B.)

<sup>2</sup> Research Federations NORVEGE Fed4277 & NORSEVE, Normandy University, F-76821 Mont-Saint-Aignan, France

<sup>3</sup> Université de Bretagne-Sud, EA 3884, LBCM, IUEM, F-56100 Lorient, France; sophie.rodrigues@univ-ubs.fr (S.R.); laure.taupin@univ-ubs.fr (L.T.); alain.dufour@univ-ubs.fr (A.D.)

<sup>4</sup> Laboratoire Ecologie et Biologie des Interactions, UMR CNRS 7267 F-86073 Poitiers, France; alexandre.crepin@univ-poitiers.fr (A.CR)

<sup>5</sup> Végénov, F-29250 Saint-Pol-de-Léon, France; turner@vegenov.com (M.T.); hamon@vegenov.com (C.H.)

<sup>6</sup> Biocontrol Consortium, F-75007 Paris, France

\* Correspondence: xavier.latour@univ-rouen.fr; +33-235-146-000 (X.L.)

## Supplementary Material

TABLE S1. Bacterial strains and plasmids used in this study

| Strain or plasmid                                                  | Relevant characteristic(s)                                                                                                                 | Source or reference |
|--------------------------------------------------------------------|--------------------------------------------------------------------------------------------------------------------------------------------|---------------------|
| <b><i>Rhizobium rhizogenes</i></b>                                 |                                                                                                                                            |                     |
| 5520 <sup>T</sup>                                                  | Type strain of <i>Rhizobium rhizogenes</i> species                                                                                         | Strain CFBP         |
| 5520 <sup>T</sup> (pHC60- <i>gfp</i> )                             | 5520 <sup>T</sup> transformed by the pHC60 vector containing the <i>gfp</i> gene to label bacteria in green fluorescence; Tet <sup>r</sup> | This study          |
| <b><i>Rhodococcus erythropolis</i></b>                             |                                                                                                                                            |                     |
| R138                                                               | AHL-degrading isolate obtained from hydroponic culture of potato plants                                                                    | [54]                |
| R138 $\Delta$ <i>qsdA</i>                                          | R138 with a 813 bp fragment deleted from the <i>qsdA</i> gene                                                                              | [61]                |
| R138 $\Delta$ <i>qsdA</i> (pEPR1- <i>mcherry</i> )                 | R138 $\Delta$ <i>qsdA</i> transformed by the pEPR1 <i>mcherry</i> plasmid to tag bacteria in red fluorescence; Km <sup>r</sup>             | [53]                |
| R138 (pEPR1- <i>qsdR</i> - <i>Pqsd::gfp<sub>uv</sub>-mcherry</i> ) | R138 strain transformed by pEPR1 <i>qsdR</i> - <i>Pqsd::gfp<sub>uv</sub>-mcherry</i> containing the transcriptional                        | [53]                |

fusion *P<sub>qsd</sub>::gfp<sub>uv</sub>* to monitor the quorum quenching activity; Km<sup>r</sup>

### *Pectobacterium*

#### *atrosepticum*

|                                                                    |                                                                                                                                                                                                       |                    |
|--------------------------------------------------------------------|-------------------------------------------------------------------------------------------------------------------------------------------------------------------------------------------------------|--------------------|
| 6276                                                               | Potato soft rot pathogen, AHL producer                                                                                                                                                                | Strain CFBP, [106] |
| 6276-EI                                                            | <i>luxI</i> ( <i>syn. expI</i> ) mutant derivative of CFBP 6276 strain unable to produce AHLs; Gm <sup>r</sup>                                                                                        | [58]               |
| 6276-EI (pME6000- <i>luxR</i> - <i>P<sub>luxI</sub>::gfp-cfp</i> ) | <i>luxI</i> ( <i>syn. expI</i> ) mutant derivative of CFBP 6276 strain transformed by pME6000- <i>luxR</i> - <i>P<sub>luxI</sub>::gfp-cfp</i> to monitor the quorum sensing activity; Tc <sup>r</sup> | [38]               |

### *Escherichia coli*

|                                            |                                                                                                                        |                 |
|--------------------------------------------|------------------------------------------------------------------------------------------------------------------------|-----------------|
| DH5α                                       | Host for cloning; SupE44 ΔlacU169 (Φ80lacZΔM15) hsdR17 recA1 endA1 gyrA96 thi-1 relA1                                  | Lab. collection |
| DH5α(pUC19)                                | Strain DH5α carrying pUC19; Ap <sup>R</sup>                                                                            | [61]            |
| DH5α(pUC19- <i>qsdA</i> )                  | QsdA-expressing DH5α; Ap <sup>R</sup>                                                                                  | [61]            |
| DH5α(pUC19- <i>qsdA</i> - <i>mCherry</i> ) | QsdA and mCherry expressing DH5α; Ap <sup>R</sup>                                                                      | This study      |
| BL21 (DE3)                                 | Strain transformed by the overexpression plasmid pET22- <i>qsdA</i> containing the lactonase encoding gene <i>qsdA</i> | [105]           |

### Plasmids

|                                                                       |                                                                                                                                                           |                 |
|-----------------------------------------------------------------------|-----------------------------------------------------------------------------------------------------------------------------------------------------------|-----------------|
| pHC60- <i>gfp</i>                                                     | Vector constitutively expressing the GFP                                                                                                                  | [104]           |
| pME6000                                                               | Cloning vector, derivative of pVS1, low copy; Tc <sup>r</sup>                                                                                             | [107]           |
| pME6000 <i>luxR</i> - <i>P<sub>luxI</sub>::gfp<sub>asv</sub>-cfp</i>  | pME6000- <i>cfp</i> with a <i>P<sub>luxI</sub>::gfp<sub>asv</sub></i> transcriptional fusion under the control of <i>luxR</i> expression; Tc <sup>r</sup> | This study      |
| pEPR1                                                                 | Shuttle promoter-probe vector carrying the promoterless <i>gfp<sub>uv</sub></i> reporter gene; Km <sup>r</sup>                                            | [108]           |
| pEPR1- <i>mcherry</i>                                                 | pEPR1 vector containing a <i>mCherry</i> cassette under constitutive promoter; Km <sup>r</sup>                                                            | This study      |
| pEPR1- <i>qsdR</i> - <i>P<sub>qsd</sub>::gfp<sub>uv</sub>-mcherry</i> | pEPR1- <i>mcherry</i> with a <i>P<sub>qsd</sub>::gfp<sub>uv</sub></i> transcriptional fusion under the control of QsdR; Km <sup>r</sup>                   | [53]            |
| pET22- <i>qsdA</i>                                                    | Overexpression vector containing the <i>qsdA</i> gene; Ap <sup>R</sup>                                                                                    | [105]           |
| pUC19                                                                 | Cloning vector for <i>E. coli</i> ; Ap <sup>R</sup>                                                                                                       | Lab. collection |
| pUC19- <i>qsdA</i>                                                    | pUC19 containing the <i>qsdA</i> gene; Ap <sup>R</sup>                                                                                                    | [61]            |
| pUC19- <i>mCherry</i>                                                 | Plasmid containing a <i>mcherry</i> cassette under constitutive promoter; Ap <sup>R</sup>                                                                 | This study      |

pUC19-*qsdA*-mCherry      Plasmid containing the *qsdA* gene and a mcherry cassette under constitutive promoter; Ap<sup>R</sup>      This study

---

Km<sup>r</sup>, Ap<sup>r</sup>, Gm<sup>r</sup> and Tc<sup>r</sup> indicate resistance to kanamycin, ampicillin, gentamycin and tetracycline, respectively. AHL, *N*-acyl homoserine lactone. CFBP, Collection Française de Bactéries associées aux Plantes, Institut National de Recherche pour l'Agriculture, l'alimentation et l'Environnement (INRAE), Angers, France. FERA: The Food and Environment Research Agency, York, U.K.

## References

106. Smadja, B.; Latour, X.; Trigui, S.; Burini, J-F.; Chevalier, S.; Orange, N. Thermodependence of growth and enzymatic activities implicated in pathogenicity of two *Erwinia carotovora* subspecies (*Pectobacterium* spp.). *Can. J. Microbiol.* **2004**, *50*, 19–27, doi:10.1139/w03-099.
107. Maurhofer, M.; Reimann, C.; Schmidli-Sacherer, P.; Heeb, S.; Haas, D.; Défago, G. Salicylic acid biosynthetic genes expressed in *Pseudomonas fluorescens* strain P3 improve the induction of systemic resistance in tobacco against tobacco necrosis virus. *Phytopathology* **1998**, *88*, 678–684, doi.org/10.1094/PHYTO.1998.88.7.678.
108. Knoppová M.; Phensajai, M.; Veselý, M.; Zemanová, M.; Nesvera, J.; Pátek M. Plasmid vectors for testing in vivo promoter activities in *Corynebacterium glutamicum* and *Rhodococcus erythropolis*. *Curr. Microbiol.* **2007**, *55*, 234–239, doi:10.1007/s00284-007-0106-1.
