# Supplementary material for: Biocontrol of Biofilm Formation: Jamming of Sessile-Associated Rhizobial Communication by Rhodococcal Quorum-Quenching
Source: MDPI journal article supplement (doi:10.3390/ijms22158241), 2021-07-31
Supplement: s1 [file s1]

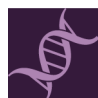

Article

# Biocontrol of Biofilm Formation: Jamming Sessile-Associated Rhizobial Communication by Rhodococcal Quorum-Quenching

Yvann Bourigault <sup>1,2</sup>, Sophie Rodrigues <sup>3</sup>, Alexandre Crépin <sup>4</sup>, Andrea Chane <sup>1</sup>, Laure Taupin <sup>3</sup>, Mathilde Bouteiller <sup>1,2</sup>, Charly Dupont <sup>1,2</sup>, Annabelle Merieau <sup>1,2</sup>, Yoan Konto-Ghiorghi <sup>1,2</sup>, Amine M. Boukerb <sup>1</sup>, Marie Turner <sup>5,6</sup>, Céline Hamon <sup>5</sup>, Alain Dufour <sup>3</sup>, Corinne Barbey <sup>1,2</sup>, and Xavier Latour <sup>1,2,6\*</sup>

<sup>1</sup> Laboratory of Microbiology Signals and Microenvironment (LMSM EA 4312), University of Rouen Normandy, 55 rue Saint-Germain, F-27000 Evreux, France; yvann.bourigault@univ-rouen.fr (Y.B.); corinne.barbey@univ-rouen.fr (C.B.); chane.andrea@gmail.com (A.C.); mathilde.bouteiller7@univ-rouen.fr (M.B.); charly.dupont7@univ-rouen.fr (C.D.); annabelle.merieau@univ-rouen.fr (A.M.); yoan.konto-ghiorghi@univ-rouen.fr (Y.K-G); amine.boukerb@univ-rouen.fr (A.M.B.)

<sup>2</sup> Research Federations NORVEGE Fed4277 & NORSEVE, Normandy University, F-76821 Mont-Saint-Aignan, France

<sup>3</sup> Université de Bretagne-Sud, EA 3884, LBCM, IUEM, F-56100 Lorient, France; sophie.rodrigues@univ-ubs.fr (S.R.); laure.taupin@univ-ubs.fr (L.T.); alain.dufour@univ-ubs.fr (A.D.)

<sup>4</sup> Laboratoire Ecologie et Biologie des Interactions, UMR CNRS 7267 F-86073 Poitiers, France; alexandre.crepin@univ-poitiers.fr (A.CR)

<sup>5</sup> Végénov, F-29250 Saint-Pol-de-Léon, France; turner@vegenov.com (M.T.); hamon@vegenov.com (C.H.)

<sup>6</sup> Biocontrol Consortium, F-75007 Paris, France

\* Correspondence: xavier.latour@univ-rouen.fr; +33-235-146-000 (X.L.)

## Supplementary Material

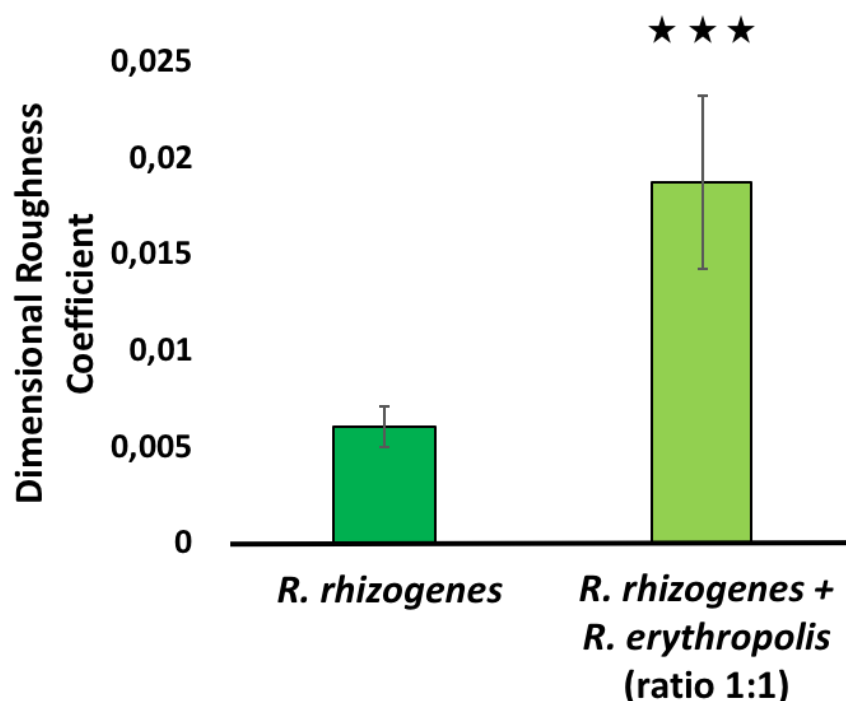

**Figure S3.** Impact of the biocontrol agent *R. erythropolis* R138 on the heterogeneity of rhizobial biofilm structure. *R. rhizogenes* 5520<sup>T</sup> was transformed with the pHc60-*gfp* plasmid to tag bacteria by the constitutive expression of *gfp*. COMSTAT2 analyses of resulting rhizobial green fluorescence allowed to establish the dimensional roughness coefficient in single and dual-species (*R. rhizogenes* plus *R. erythropolis*) biofilms. The data shown are the means of at least three measurements from three independent experiments. Significant differences (Mann and Whitney test; *p*-value < 0.01) are indicated by asterisks (\*\*\* *P* < 0.001).
