# Supplementary material for: Biocontrol of Biofilm Formation: Jamming of Sessile-Associated Rhizobial Communication by Rhodococcal Quorum-Quenching
Source: MDPI journal article supplement (doi:10.3390/ijms22158241), 2021-07-31
Supplement: s1 [file s1]

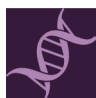

Article

# Biocontrol of Biofilm Formation: Jamming Sessile-Associated Rhizobial Communication by Rhodococcal Quorum-Quenching

Yvann Bourigault <sup>1,2</sup>, Sophie Rodrigues <sup>3</sup>, Alexandre Crépin <sup>4</sup>, Andrea Chane <sup>1</sup>, Laure Taupin <sup>3</sup>, Mathilde Bouteiller <sup>1,2</sup>, Charly Dupont <sup>1,2</sup>, Annabelle Merieau <sup>1,2</sup>, Yoan Konto-Ghiorghi <sup>1,2</sup>, Amine M. Boukerb <sup>1</sup>, Marie Turner <sup>5,6</sup>, Céline Hamon <sup>5</sup>, Alain Dufour <sup>3</sup>, Corinne Barbey <sup>1,2</sup>, and Xavier Latour <sup>1,2,\*</sup>

<sup>1</sup> Laboratory of Microbiology Signals and Microenvironment (LMSM EA 4312), University of Rouen Normandy, 55 rue Saint-Germain, F-27000 Evreux, France; yvann.bourigault@univ-rouen.fr (Y.B.); corinne.barbey@univ-rouen.fr (C.B.); chane.andrea@gmail.com (A.C.); mathilde.bouteiller7@univ-rouen.fr (M.B.); charly.dupont7@univ-rouen.fr (C.D.); annabelle.merieau@univ-rouen.fr (A.M.); yoan.konto-ghiorghi@univ-rouen.fr (Y.K-G); amine.boukerb@univ-rouen.fr (A.M.B.)

<sup>2</sup> Research Federations NORVEGE Fed4277 & NORSEVE, Normandy University, F-76821 Mont-Saint-Aignan, France

<sup>3</sup> Université de Bretagne-Sud, EA 3884, LBCM, IUEM, F-56100 Lorient, France; sophie.rodrigues@univ-ubs.fr (S.R.); laure.taupin@univ-ubs.fr (L.T); alain.dufour@univ-ubs.fr (A.D.)

<sup>4</sup> Laboratoire Ecologie et Biologie des Interactions, UMR CNRS 7267 F-86073 Poitiers, France; alexandre.crepin@univ-poitiers.fr (A.CR)

<sup>5</sup> Végénov, F-29250 Saint-Pol-de-Léon, France; turner@vegenov.com (M.T.); hamon@vegenov.com (C.H.)

<sup>6</sup> Biocontrol Consortium, F-75007 Paris, France

\* Correspondence: xavier.latour@univ-rouen.fr; +33-235-146-000 (X.L.)

## Supplementary Material

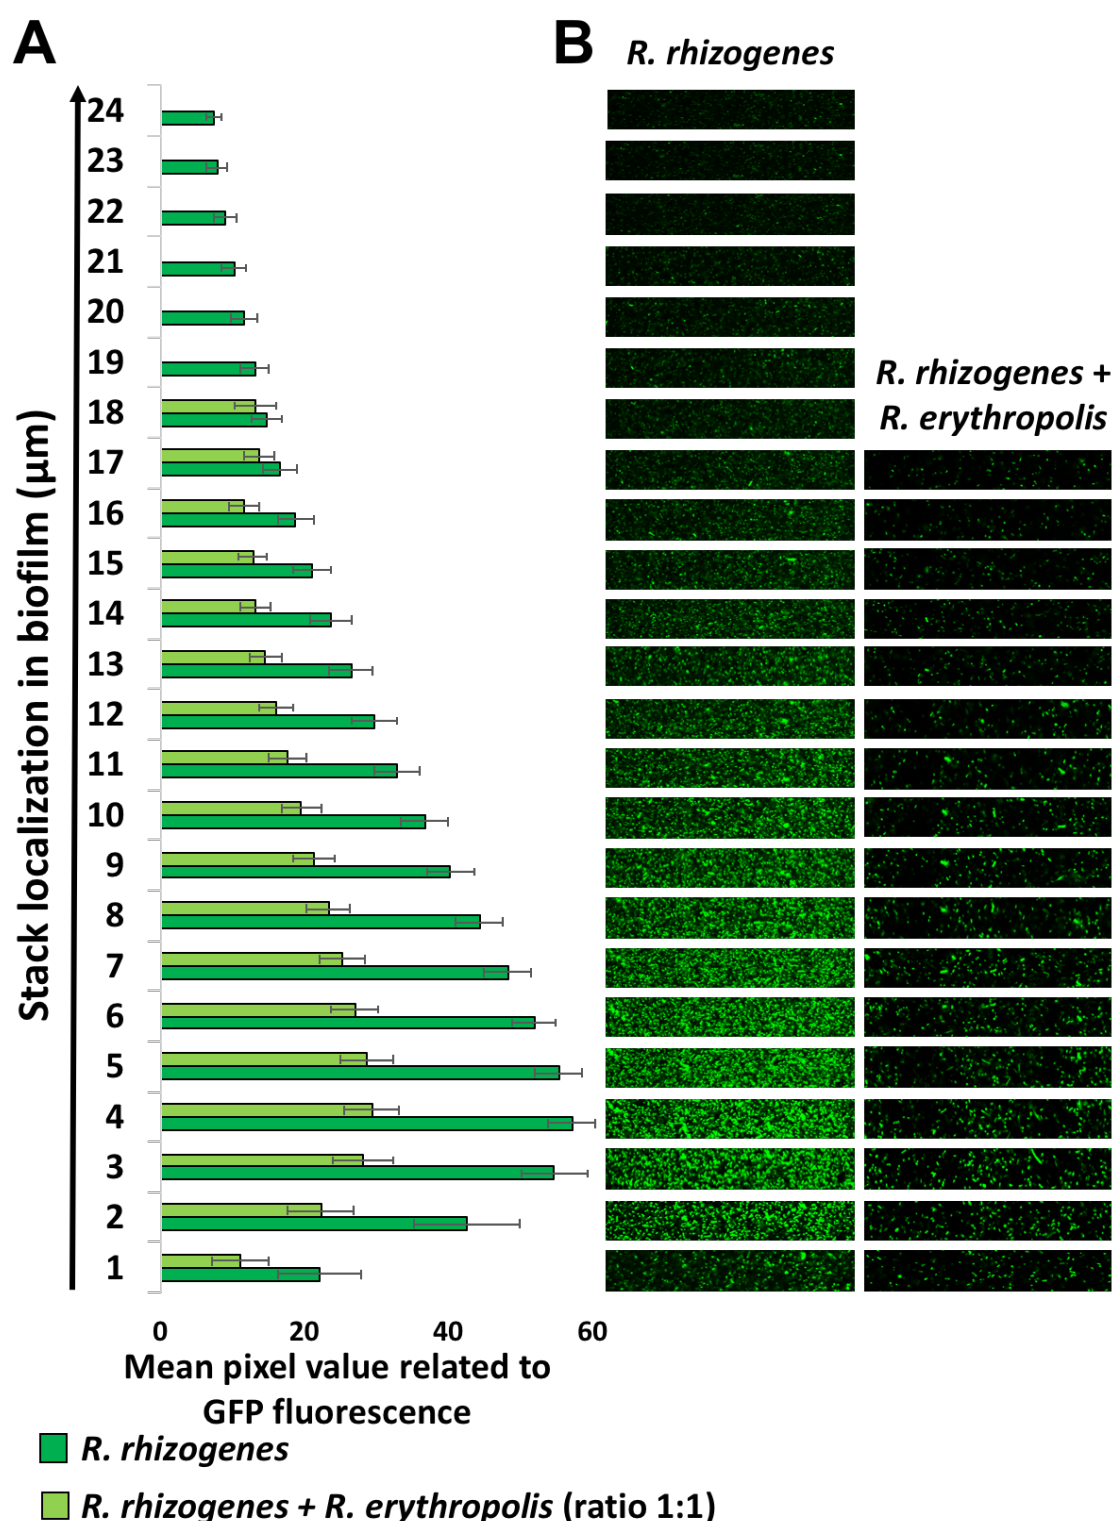

**Figure S4.** Impact of the biocontrol agent *R. erythropolis* R138 on the heterogeneity of rhizobial cell distribution within the biofilm. Confocal laser scanning microscopy (CLSM) analysis of the *R. rhizogenes* 5520<sup>T</sup> biofilm or dual species biofilm formed by *R. rhizogenes* 5520<sup>T</sup> and *R. erythropolis* R138 was achieved at an inoculation ratio of 1:1. *R. rhizogenes* and *R. erythropolis* bacteria were tagged with GFP and mCherry via the pHG60-*gfp* and pEPR1-*mCherry* vectors, respectively. (A) Pixel quantification of each of the twenty four (single species biofilm) and nineteen (dual specie biofilm) stacks representing the entire biofilm structure of the two tested conditions (1  $\mu\text{m}$  stack). Each bar represents the pixel quantification value related to the GFP signal detected on the 2D CLSM images of the *R. rhizogenes* strain in both condition. (B) Related 2D CLSM images of each pixel quantification value for both condition. The data shown are the means of at least three measurements from three independent experiments.
